# Supplementary material
Source: PubMed Central journal article supplement (PMC212784)
Supplement: jamia_M1290_1.pdf [file jamia_M1290_1.pdf]

## I. On-line data supplement: Appendix

In a 2x2 contingency table (cf. table A1) the proportion  $A/(A+C)$  is called recall in retrieval studies. This corresponds to sensitivity as benchmark of diagnostic tests. The proportion  $A/(A+B)$  is called precision, which corresponds to the positive predictive value as benchmark of diagnostic tests. Hogan and Wagner<sup>18</sup> defined completeness similar to recall and correctness similar to precision. Logan et al.<sup>13</sup> introduced an additional category for the documentation under consideration (cf. table A2). They use four categories in comparison with a gold standard: 1) items present and correct ( $n_1$ ), 2) items present and incorrect ( $n_2$ ), 3) items absent ( $n_3$ ), 4) new and therefore incorrect items ( $n_4$ ). Completeness is then defined as  $(n_1+n_2)/(n_1+n_2+n_3)$ , correctness as  $n_1/(n_1+n_2+n_4)$ . For completeness the denominator is equal in both definitions. It consists of all items present in the gold standard. But Logan et al. shift the present but incorrect items into the numerator, which leads to a higher value for completeness. For correctness numerator and denominator are equal. In case of a missing gold standard we have to be aware of  $s_1$  and  $s_2$  in table A2 too.

## II. On-line data supplement: Tables

Table 1

Inter-coder reliability of the principal diagnosis

| Level of ICD-10-SGB-V 2.0 | Number of concordant cases | Weighted kappa | 95 % Confidence limits | Assessment according to Landis and Koch <sup>13</sup> |
|---------------------------|----------------------------|----------------|------------------------|-------------------------------------------------------|
| Terminal code             | 120                        | 0.49           | 0.42-0.55              | Moderate                                              |
| Maximally 4-digits        | 125                        | 0.51           | 0.44-0.57              | Moderate                                              |
| 3-digits                  | 166                        | 0.67           | 0.61-0.73              | Substantial                                           |
| Group                     | 202                        | 0.82           | 0.77-0.87              | Almost perfect                                        |
| Chapter                   | 211                        | 0.84           | 0.78-0.89              | Almost perfect                                        |

Table 2

Use of “other” and “unspecified” in both sets before and after validation. Percents are calculated from the total number of diagnoses (909 PPR-set, 959 EPR-set), from the number of principal diagnoses (244 in each set) and from the total number of procedures (765 PPR-set, 940 EPR-set).

|                                        | PPR-set      |            | EPR-set      |              |
|----------------------------------------|--------------|------------|--------------|--------------|
|                                        | Native       | Validated  | Native       | Validated    |
| ICD-10-SGB-V 2.0 (all diagnoses)       |              |            |              |              |
| ---.8- (“other”)                       | 68 (7.5 %)   | 59 (6.5 %) | 82 (8.6 %)   | 71 (7.4 %)   |
| ---.9- (“unspecified”)                 | 154 (16.9 %) | 66 (7.3 %) | 217 (22.6 %) | 106 (11.1 %) |
| ICD-10-SGB-V 2.0 (principal diagnoses) |              |            |              |              |
| ---.8- (“other”)                       | 11 (4.5 %)   | 8 (3.3 %)  | 9 (3.7 %)    | 5 (2.0 %)    |
| ---.9- (“unspecified”)                 | 46 (18.9 %)  | 13 (5.3 %) | 70 (28.7 %)  | 28 (11.5 %)  |
| OPS-301 2.0                            |              |            |              |              |
| x (“other”)                            | 11 (1.4 %)   | 11 (1.4 %) | 13 (1.4 %)   | 13 (1.4 %)   |
| y (“unspecified”)                      | 34 (4.4 %)   | 34 (4.4 %) | 22 (2.3 %)   | 22 (2.3 %)   |

Table 3

Procedures with more than 10 occurrences in descending order of the EPR-set. The German text was translated by the authors.

| Code OPS-301 2.0 | Text OPS-301 2.0                                              | PPR-set | EPR-set |
|------------------|---------------------------------------------------------------|---------|---------|
| 5-572.1          | Percutaneous cystostomy                                       | 14      | 23      |
| 5-530.1          | Repair of inguinal hernia with synthetic substitute           | 16      | 19      |
| 5-511.11         | Laparoscopic cholecystectomy without revision of bile ducts   | 13      | 13      |
|                  |                                                               | ...     |         |
| 5-893.0g         | Cleaning of small wound foot                                  | 3       | 13      |
| 5-385.70         | Crossektomie and stripping of greater saphenous vein one side | 6       | 12      |

Table 4

Concordance of the PPR-set and the EPR-set concerning DRGs. The numbers refer to identical results for a case.

| Level of AR-DRGs            | Number of concordant cases | Percentage of concordant cases |
|-----------------------------|----------------------------|--------------------------------|
| Principal diagnosis and DRG | 93                         | 38.1 %                         |
| DRG                         | 152                        | 62.3 %                         |
| Adjacent DRG                | 179                        | 73.4 %                         |
| MDC                         | 213                        | 87.3 %                         |

Table 5

Economical profit through optimization of coding from the PPR. The results of Mieth et al.<sup>33</sup> were estimated with a CMI of 3,5 before optimization.

|                               | Profit by coding from the PPR | CMI PPR/EPR |
|-------------------------------|-------------------------------|-------------|
| This study                    | 1.5 %                         | 2,09/2,06   |
| Langrehr et al. <sup>32</sup> | 14.0 %                        | 3,52/3,28   |
| Mieth et al. <sup>33</sup>    | 16.4 %                        |             |
| Ingenerf et al. <sup>26</sup> | 36.7 %                        | 2.83/2.07   |

Table A1

Definition of completeness ( $A/(A+C)$ ) and correctness ( $A/(A+B)$ ) of Hogan and Wagner<sup>18</sup>

|               | Gold standard |        |           |
|---------------|---------------|--------|-----------|
| Documentation | Present       | Absent |           |
| Present       | A             | B      | $A/(A+B)$ |
| Absent        | C             | D      |           |
|               | $A/(A+C)$     |        |           |

Table A2

Definition of completeness  $((n1+n2)/(n1+n2+n3))$  and correctness  $(n1/(n1+n2+n4))$  of Logan et al.<sup>13</sup>

|                   | Gold standard        |        |                 |
|-------------------|----------------------|--------|-----------------|
| Documentation     | Present              | Absent |                 |
| Present correct   | n1                   | s1     |                 |
| Present incorrect | n2                   | n4     | $n1/(n1+n2+n4)$ |
| Absent            | n3                   | s2     |                 |
|                   | $(n1+n2)/(n1+n2+n3)$ |        |                 |
